# Supplementary material
Source: PubMed Central journal article supplement (PMC3208217)
Supplement: tjp0589-4437-SD1.pdf [file tjp0589-4437-SD1.pdf]

Supplemental Information: Figure S1

Ca<sub>v</sub>1.2 ( $\alpha_{1C}$ ) : Accession # CAA33546

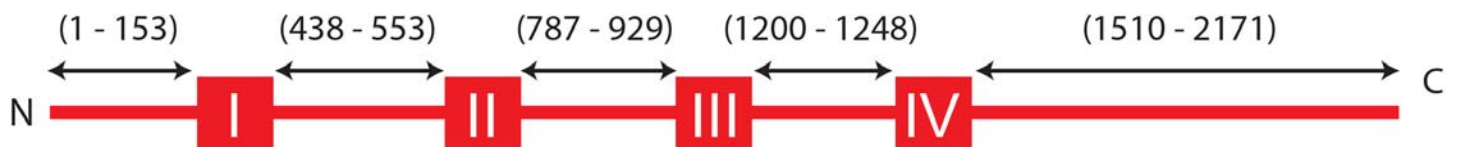

Ca<sub>v</sub>3.1 ( $\alpha_{1G}$ ) : Accession # AAC67372

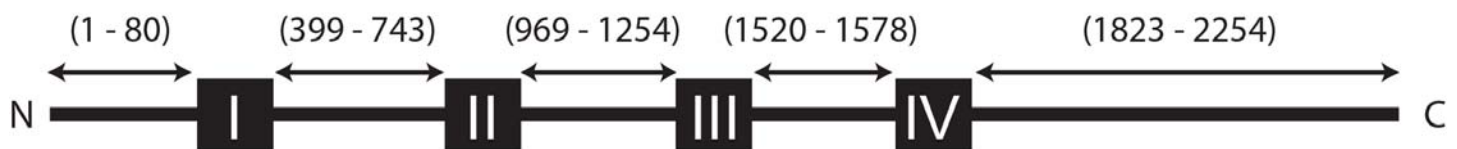

**Figure S1.** Schematic showing precise boundaries of the N- and C-termini, and intracellular loops of Ca<sub>v</sub>1.2 (top) and Ca<sub>v</sub>3.1 channels (*bottom*) used to generate chimeric channels.

Supplemental Information: Figure S2

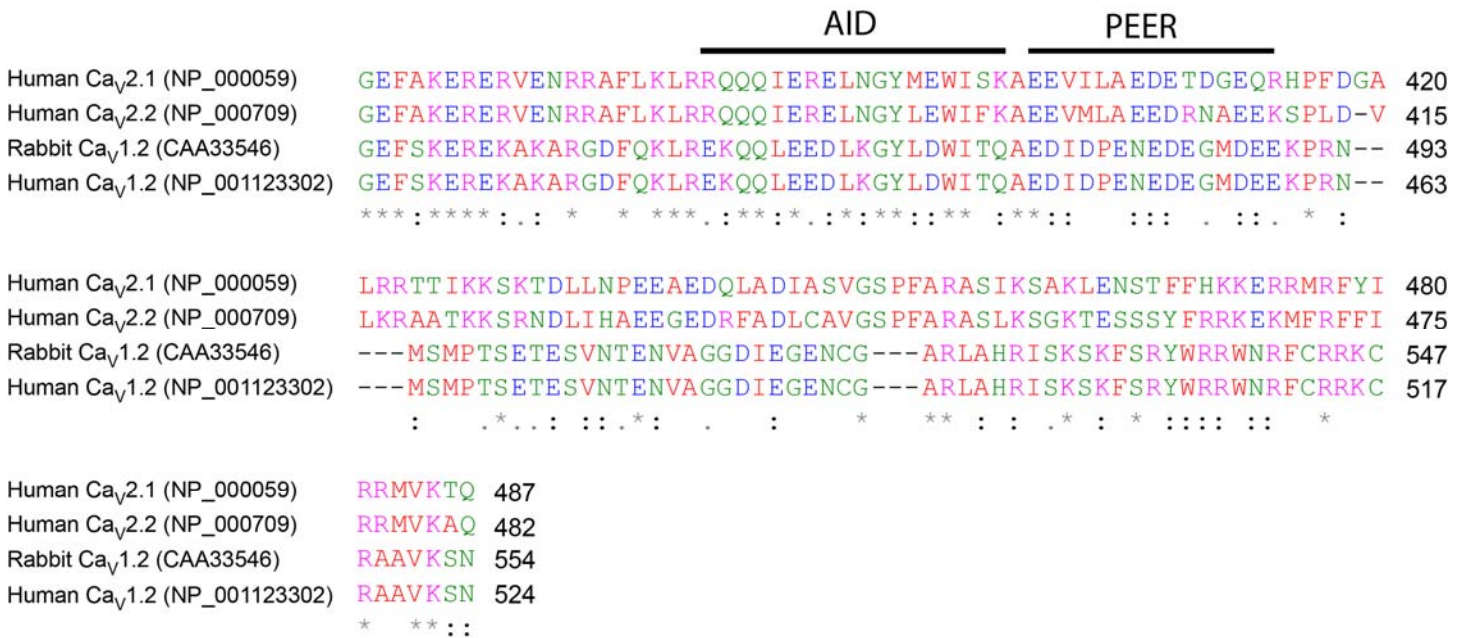

**Figure S2.** ClustalW alignment of the intracellular I-II loop of distinct Ca<sub>v</sub>1 and 2 channels showing regions of sequence conservation and homology. The previously identified  $\alpha$  interaction domain (AID) is shown. Immediately downstream of the AID is the acidic-residue-rich putative ER export region (PEER) identified in this study.

Supplemental Information: Figure S3

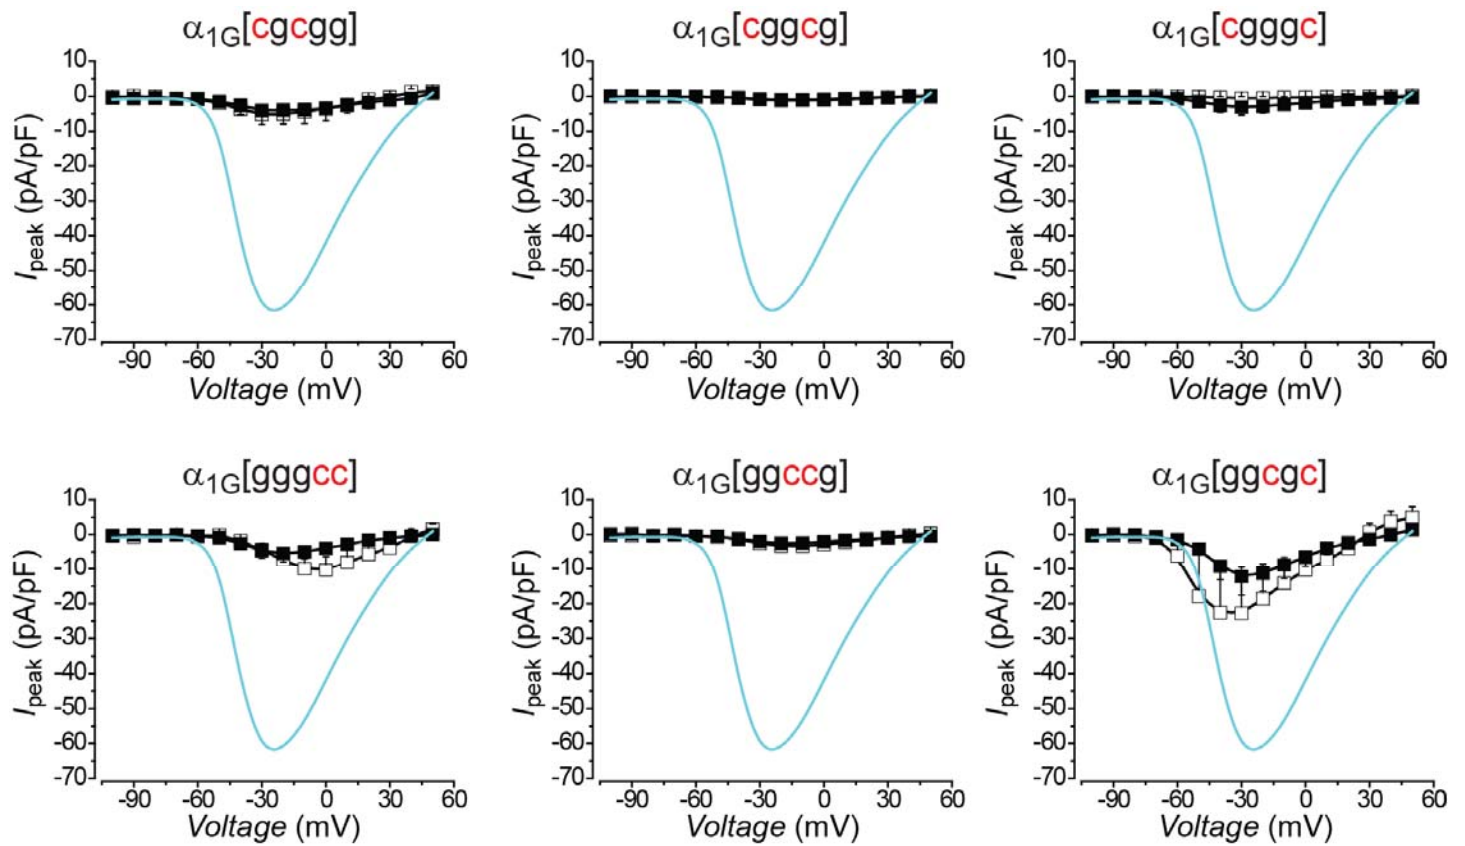

**Figure S3.**  $I_{\text{peak}}-V$  curves of double-intracellular-domain substituted chimeras either expressed alone (open symbols) or with  $\beta_{2a}$  subunits (solid symbols).

Supplemental Information: Figure S4

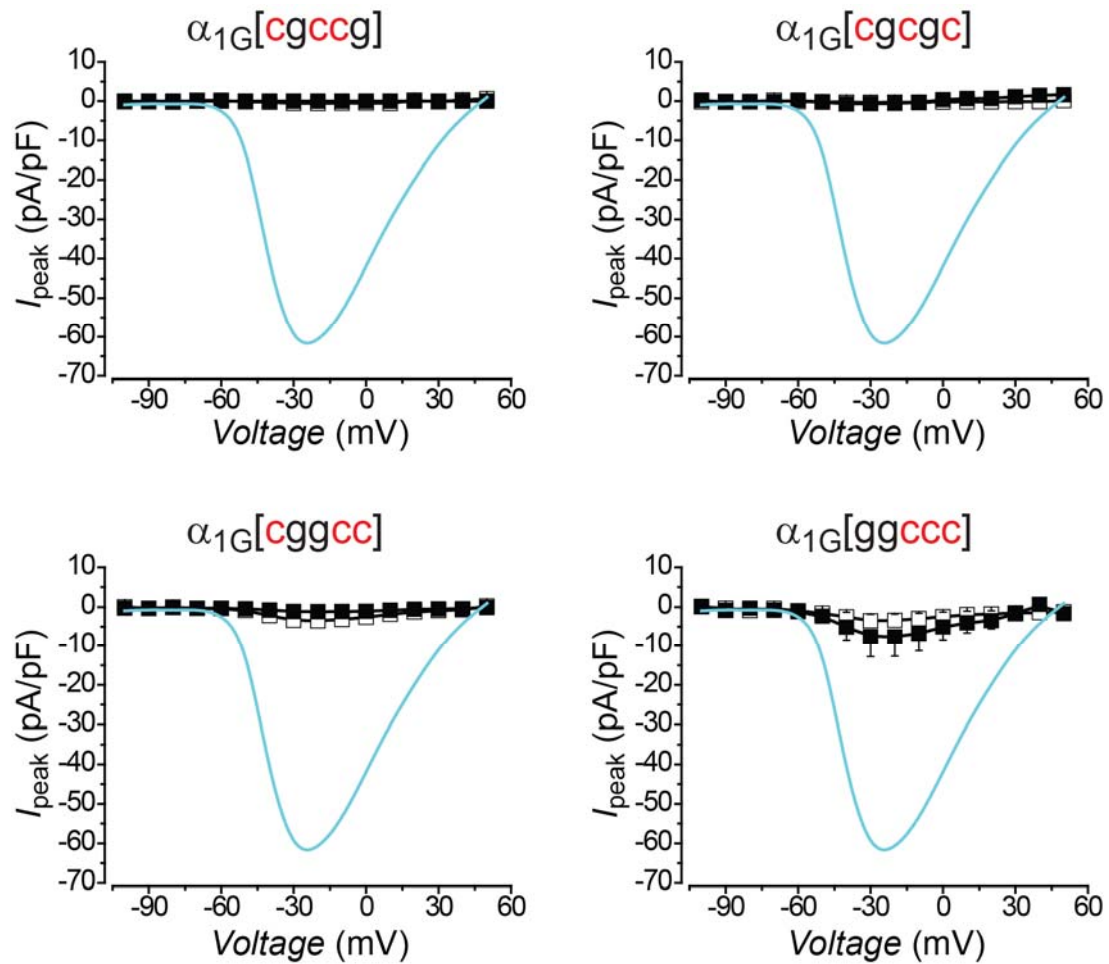

**Figure S4.**  $I_{\text{peak}}-V$  curves of triple-intracellular-domain substituted chimeras either expressed alone (open symbols) or with  $\beta_{2a}$  subunits (solid symbols).

Supplemental Information: Figure S5

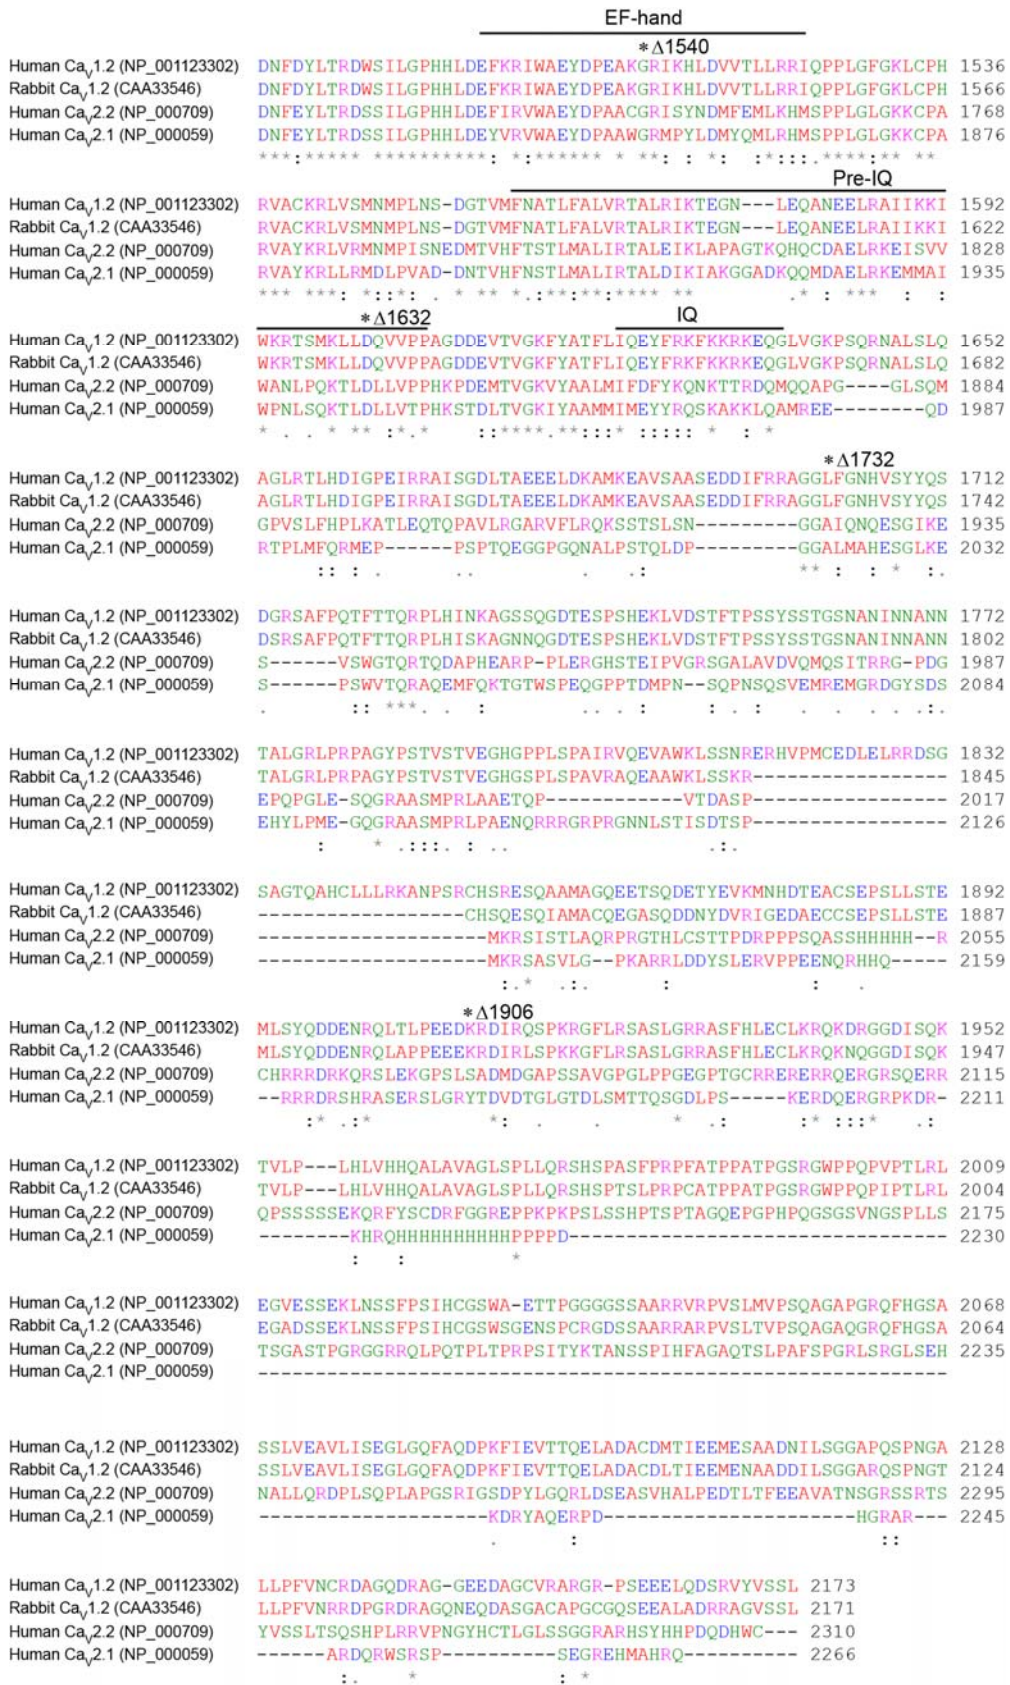

Figure S5. ClustalW alignment of the C-termini of distinct Ca<sub>v</sub>1 and 2  $\alpha_1$  subunits.

Supplemental Information: Figure S6

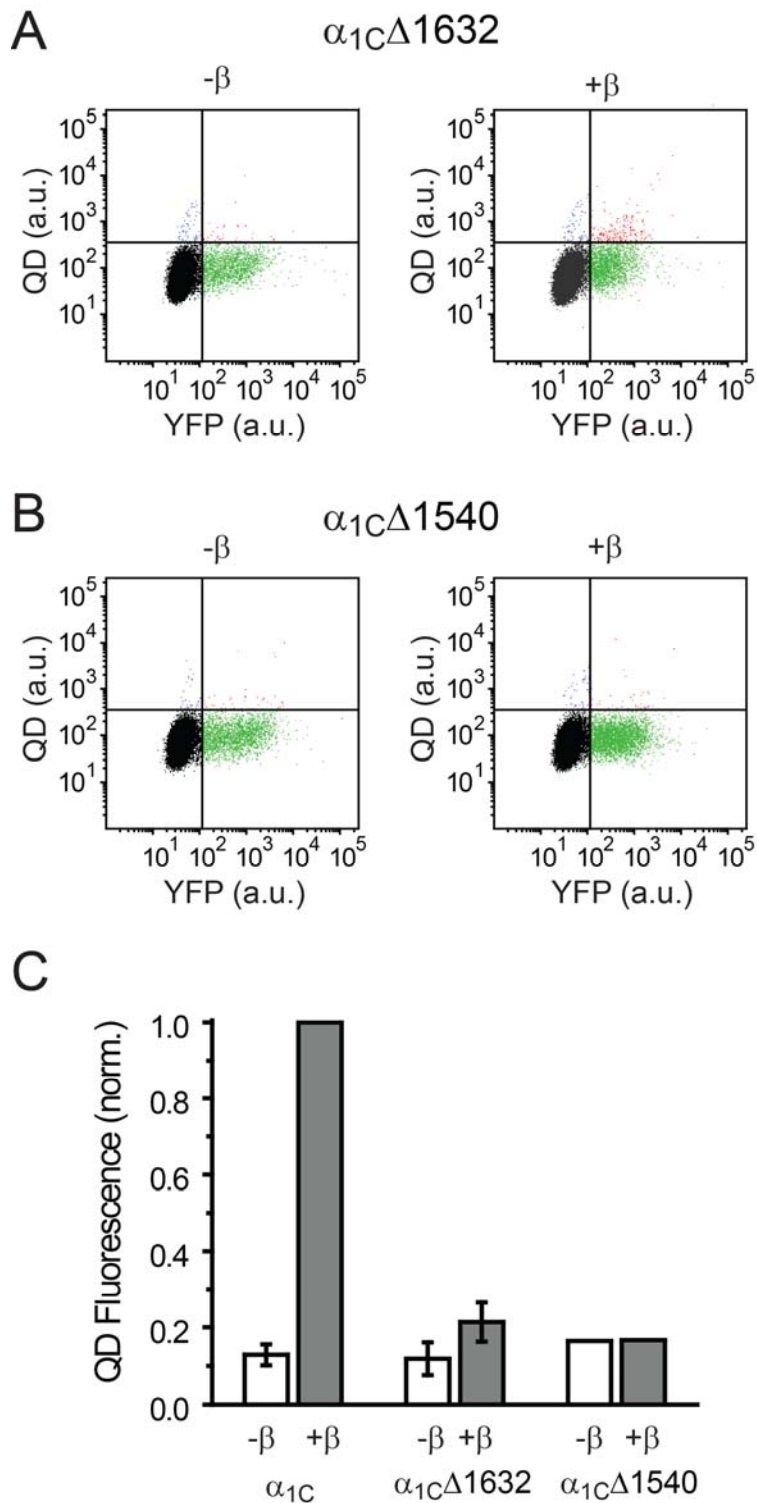

**Figure S6. Impact of C-terminus truncations on  $\beta$ -dependent membrane-targeting of  $\alpha_{1C}$  subunits.** (A, B) Exemplar flow cytometry results for  $\alpha_{1C}\Delta1632 \pm \beta_{2a}$  and  $\alpha_{1C}\Delta1540 \pm \beta_{2a}$ , respectively. (C) Normalized QD fluorescence intensity for truncated mutants compared to full-length  $\alpha_{1C}$ .

**Table S1.** PCR primers used to generate single-intracellular-domain substituted chimeras by using in-fusion technique. For each chimera, four primers were required. The underlined 15-nucleotide segments are within the boundary of  $\alpha_{1G}$  at the  $\alpha_{1G}/\alpha_{1C}$  junctions. The red 15-nucleotide segments in forward primer for insert and in reverse primer for vector, and the blue 15-nucleotide segments in forward primer for vector and in reverse primer for insert, are complementary reversal, respectively, thus the purified PCR insert and vector could be directly linked together with the consequent in-fusion reaction.

| Constructs            | PCR Targets                            | Templates          | Primer 1 (Forward)                                       | Primer 2 (Reverse)                                         |
|-----------------------|----------------------------------------|--------------------|----------------------------------------------------------|------------------------------------------------------------|
| $\alpha_{1G}$ [cgggg] | Insert<br>( $\alpha_{1C}$ N-Terminus)  | $\alpha_{1C}$ -YFP | <u>GCTTCTGGCCAGAGG</u> ATGCTTCGAGCCCTTG<br>TTCAGCCAGCTAC | <u>TCGCTCGAACCACGG</u> CCACTCGACGATGCTTA<br>TGCACGCC       |
|                       | Vector                                 | $\alpha_{1G}$ -YFP | <u>CCGTGGTTCGAGCGA</u> GTCAGTATG                         | <u>CCTCTGGCCAGAAGC</u> TAAAGTTTAAAC                        |
| $\alpha_{1G}$ [gcggg] | Insert<br>( $\alpha_{1C}$ I-II loop)   | $\alpha_{1C}$ -YFP | <u>ATTGCCACGCAGTTC</u> TCCAAAGAGAGGGAGA<br>AGGCCAAAGC    | <u>CCGGCCAAAGTATTT</u> CGACTTGACCGCTGCGC<br>GGCACTTTCTCCTG |
|                       | Vector                                 | $\alpha_{1G}$ -YFP | <u>AAATACTTTGGCCGG</u> GGAATCATG                         | <u>GAACTGCGTGGCAAT</u> CACCACCAGGCAC                       |
| $\alpha_{1G}$ [ggcgg] | Insert<br>( $\alpha_{1C}$ II-III loop) | $\alpha_{1C}$ -YFP | <u>CTTGTGGAAGGATTC</u> GCTGATGCTGAGAGCC<br>TTACTTCTGC    | <u>ATGGTCAAACATCTT</u> GTCGTTGACGATACGGT<br>GACACTG        |
|                       | Vector                                 | $\alpha_{1G}$ -YFP | <u>AAGATGTTTGACCAT</u> GTGGTCCTCG                        | <u>GAATCCTTCCACAAG</u> AATGGCCACCAGCAGGT<br>TAAAG          |
| $\alpha_{1G}$ [ggggc] | Insert<br>( $\alpha_{1C}$ III-IV loop) | $\alpha_{1C}$ -YFP | <u>GTGGTGGAGAACTTC</u> CAGGAGCAGGGGGAGC<br>AGGAGTAC      | <u>GAGGTCCAGGTAGTG</u> GGAGTTGACCACGTACC<br>ACACTTTG       |
|                       | Vector                                 | $\alpha_{1G}$ -YFP | <u>CACTACCTGGACCTC</u> TTCATCACTG                        | <u>GAAGTTCTCCACCAC</u> CACGCCACAAACATG                     |
| $\alpha_{1G}$ [ggggc] | Insert<br>( $\alpha_{1C}$ C-Terminus)  | $\alpha_{1C}$ -YFP | <u>CTGATGAAGCACCTG</u> GACTACCTGACAAGGG<br>ACTGGTCAATC   | <u>CTTGCTCACATCGAT</u> CAGGCTGCTGACGCCGG<br>CCCTGCGGTCCCGC |
|                       | Vector                                 | $\alpha_{1G}$ -YFP | <u>ATCGATGTGAGCAAG</u> GGCGAGGAGCTGTTC                   | <u>CAGGTGCTTCATCAG</u> CACAGCTATG                          |
